# Supplementary material for: Immune Cell Infiltration in the Microenvironment of Liver Oligometastasis from Colorectal Cancer: Intratumoural CD8/CD3 Ratio Is a Valuable Prognostic Index for Patients Undergoing Liver Metastasectomy
Source: PubMed Central journal article supplement (PMC6966431; doi:10.3390/cancers11121922), 2019-12-02
Supplement: cancers-11-01922-s001.pdf [file cancers-11-01922-s001.pdf]

Supplementary materials

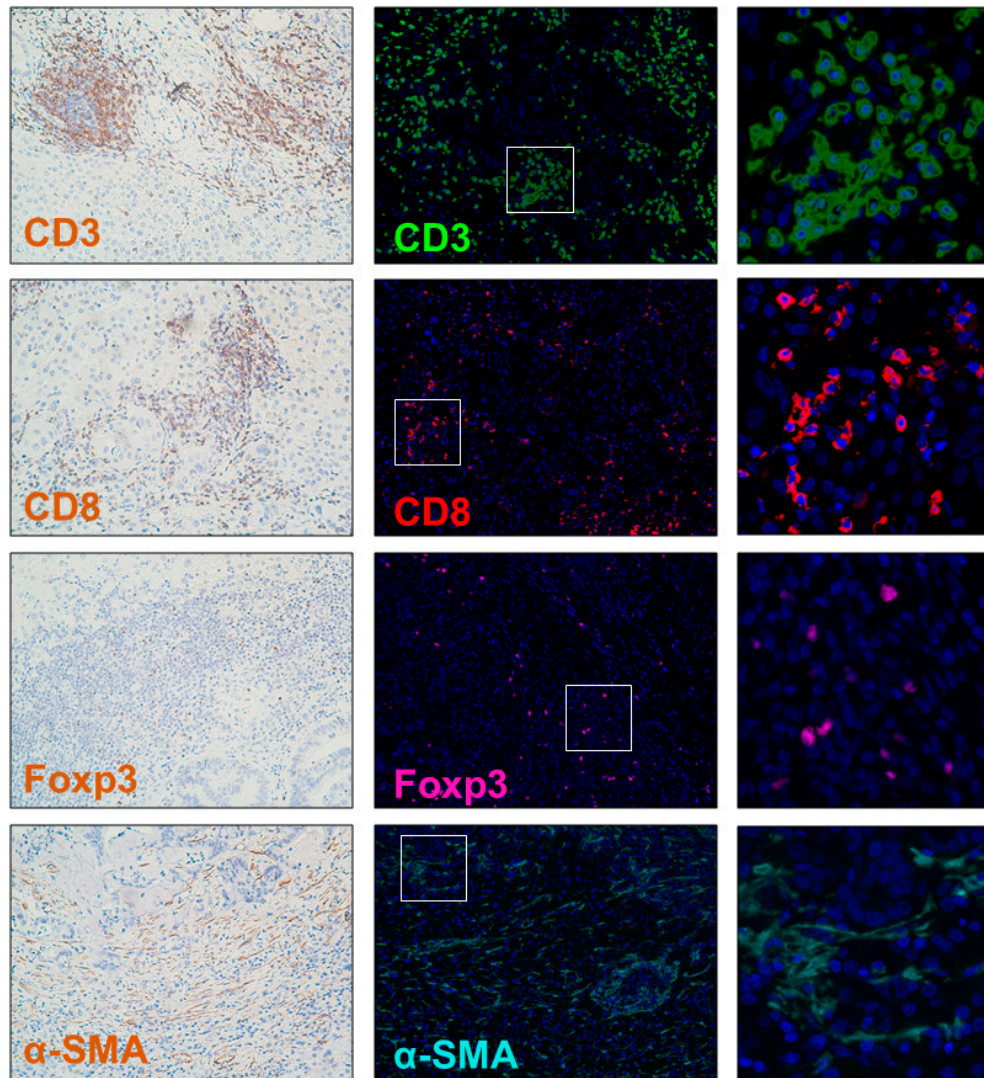

**Figure S1.** Microphotographs of representative examples of validation from IHC (left panels), uniplex IF immune cell markers or  $\alpha$ SMA (middle panels), and details of uniplex IF in liver oligometastasis tissue (right panels).

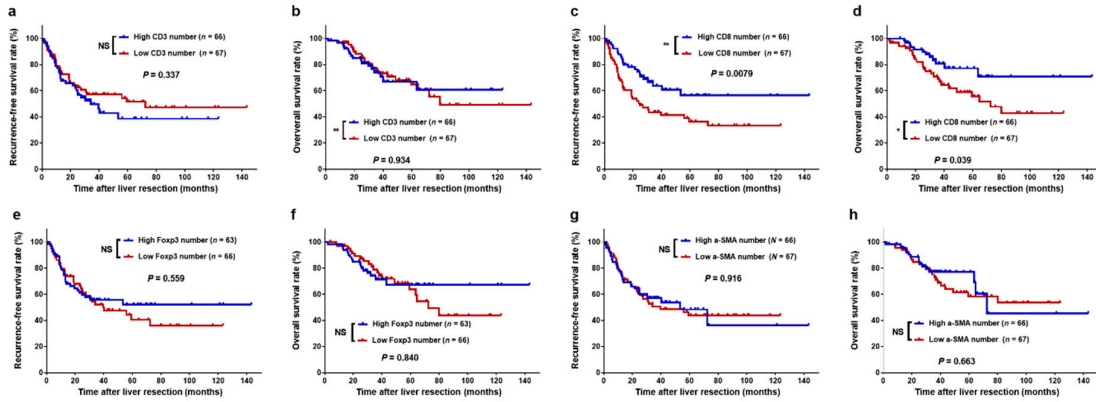

**Figure S2.** Kaplan–Meier survival curves of CLO patients after liver metastasectomy stratified by the different number of tumour-infiltrating lymphocyte and  $\alpha$ -SMA positive cells in intratumoural regions of liver metastases. (a) Recurrence-free survival (RFS) for CD3 positive cells number; (b) overall survival (OS) for CD3 positive cells; (c) RFS for CD8 positive cells; (d) OS for CD8 positive cells; (e) RFS for Foxp3 positive cells; (f) OS for Foxp3 positive cells; (g) RFS for  $\alpha$ -SMA positive cells; (h) OS for  $\alpha$ -SMA positive cells. \*  $P < 0.05$ , \*\*  $P < 0.01$ , NS, not significant.

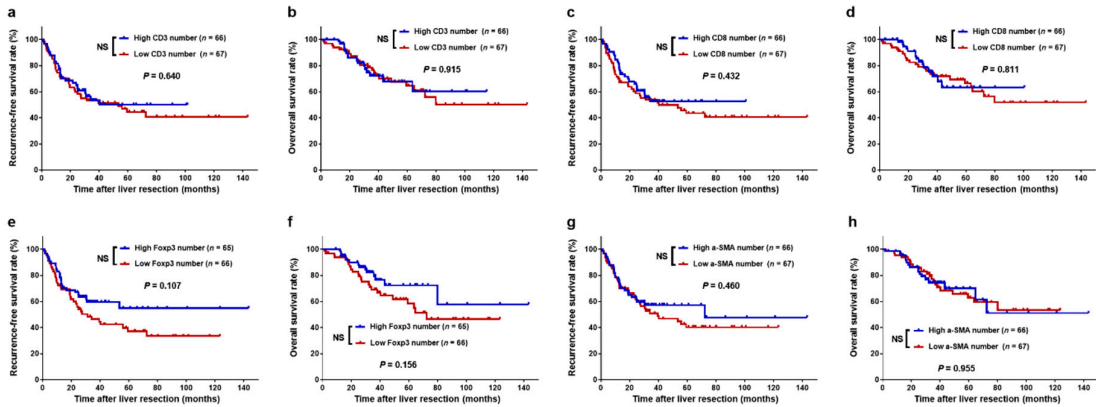

**Figure S3.** Kaplan–Meier survival curves of CLO patients after liver metastasectomy stratified by the different number of tumour-infiltrating lymphocyte and  $\alpha$ -SMA positive cells in peritumoural regions of liver metastases. (a) Recurrence-free survival (RFS) for CD3 positive cells number; (b) overall survival (OS) for CD3 positive cells; (c) RFS for CD8 positive cells; (d) OS for CD8 positive cells; (e) RFS for Foxp3 positive cells; (f) OS for Foxp3 positive cells; (g) RFS for  $\alpha$ -SMA positive cells; (h) OS for  $\alpha$ -SMA positive cells. \*  $P < 0.05$ , \*\*  $P < 0.01$ , NS, not significant.

**Table S1.** Immunohistochemical multiplex staining protocol.

| Antigen       | Primary antibody |          | Catalogue number | Secondary polymer                |                    | TSA fluorophore (nm) |
|---------------|------------------|----------|------------------|----------------------------------|--------------------|----------------------|
|               | Concentration    | Provider |                  | Polymer                          | Provider           |                      |
| CD3           | 1:800            | ZSGB-BIO | ZA-0503          | EnVision<br>Detection<br>Systems | Dako<br>Cytomation | 520                  |
| CD8           | 1:400            | ZSGB-BIO | ZA-0508          |                                  |                    | 690                  |
| Foxp3         | 1:100            | Abcam    | ab20034          |                                  |                    | 620                  |
| $\alpha$ -SMA | 1:1000           | ZSGB-BIO | ZM-0003          |                                  |                    | 570                  |
| Pan-Keratin   | 1:400            | CST      | 4545S            |                                  |                    | 520                  |

Abbreviations: TSA, tyramide signal amplification, CST, Cell Signaling Technology.
